# Supplementary material
Source: PubMed Central journal article supplement (PMC6644282)
Supplement: ao7b01109_si_001.pdf [file ao7b01109_si_001.pdf]

## **Controlling the Degree of Esterification of Citrus Pectin for Demanding Applications by Selection of the Source**

**Rosaria Ciriminna,<sup>a</sup> Alexandra Fidalgo,<sup>b</sup> Riccardo Delisi,<sup>a</sup> Alfredo Tamburino,<sup>c</sup> Diego Carnaroglio,<sup>c,d</sup> Giancarlo Cravotto,<sup>c</sup> Laura M. Ilharco,<sup>b,\*</sup> Mario Pagliaro<sup>a,\*</sup>**

*<sup>a</sup>Istituto per lo Studio dei Materiali Nanostrutturati, CNR, via U. La Malfa 153, 90146 Palermo, Italy; <sup>b</sup>Centro de Química-Física Molecular and IN-Institute of Nanoscience and Nanotechnology, Instituto Superior Técnico, Universidade de Lisboa, Av. Rovisco Pais 1, 1049-001 Lisboa, Portugal; <sup>c</sup>Dipartimento di Scienza e Tecnologia del Farmaco and Centre for Nanostructured Interfaces and Surfaces, Università degli Studi di Torino, via P. Giuria 9, 10125 Torino, Italy; <sup>d</sup>Milestone, via Fabenefratelli, 1-5, 24010 Sorisole, Bergamo, Italy; <sup>e</sup>Dipartimento Agricoltura, Legambiente Sicilia, via Tripoli 3, 90138 Palermo, Italy*

### **Supplementary Information**

**Table S1.** Assignment of the DRIFT spectra of pectin from different sources, present work

| Assignment                                                               | Orange outer skin     | Lemon outer skin     | Orange peel          | Lemon peel           | Grapefruit peel       | Orange waste         | Lemon waste           |
|--------------------------------------------------------------------------|-----------------------|----------------------|----------------------|----------------------|-----------------------|----------------------|-----------------------|
| $\nu$ O-H                                                                | 3483 <sub>S,sh</sub>  | 3510 <sub>VS</sub>   | 3496 <sub>VS</sub>   | 3516 <sub>VS</sub>   | 3479 <sub>VS,sh</sub> | 3465 <sub>VS</sub>   | 3467 <sub>S</sub>     |
| $\nu$ O-H                                                                | 3303 <sub>VS</sub>    | 3271 <sub>VS</sub>   | 3253 <sub>VS</sub>   | 3290 <sub>VS</sub>   | 3290 <sub>VS</sub>    | 3373 <sub>VS</sub>   | 3270 <sub>VS</sub>    |
| $\nu$ CH                                                                 |                       | 2943 <sub>S</sub>    |                      | 2941 <sub>S</sub>    |                       |                      | 2941 <sub>S</sub>     |
| $\nu$ CH                                                                 | 2933 <sub>S</sub>     |                      | 2929 <sub>VS</sub>   |                      | 2931 <sub>VS</sub>    | 2935 <sub>S</sub>    |                       |
| $\nu$ CH                                                                 | 2914 <sub>S</sub>     | 2910 <sub>S</sub>    |                      | 2910 <sub>S</sub>    |                       |                      | 2912 <sub>S</sub>     |
| $\nu$ CH                                                                 | 2897 <sub>S,sh</sub>  |                      |                      |                      | 2895 <sub>VS</sub>    | 2895 <sub>S,sh</sub> |                       |
| $\nu$ (C=O) <sub>carb.ac.</sub>                                          | 1724 <sub>m</sub>     | 1729 <sub>m</sub>    | 1724 <sub>m</sub>    | 1728 <sub>VS</sub>   | 1720 <sub>m</sub>     | 1726 <sub>m</sub>    | 1724 <sub>VS</sub>    |
|                                                                          |                       | 1670 <sub>m</sub>    |                      |                      | 1626 <sub>m</sub>     |                      |                       |
| $\nu_{as}$ (COO')                                                        | 1603 <sub>S</sub>     | 1591 <sub>m</sub>    | 1601 <sub>S</sub>    | 1595 <sub>S</sub>    | 1603 <sub>S</sub>     | 1606 <sub>S</sub>    | 1597 <sub>VS</sub>    |
|                                                                          | 1516 <sub>w</sub>     |                      | 1514 <sub>m</sub>    | 1516 <sub>w</sub>    | 1518 <sub>m</sub>     | 1514 <sub>w</sub>    | 1512 <sub>m</sub>     |
|                                                                          |                       |                      |                      |                      | 1500 <sub>m</sub>     |                      | 1458 <sub>S</sub>     |
|                                                                          |                       | 1444 <sub>m</sub>    |                      |                      | 1442 <sub>S</sub>     | 1443 <sub>S,sh</sub> | 1440 <sub>VS</sub>    |
| $\delta_{as}$ (CH <sub>3</sub> ) <sub>ester</sub>                        | 1417 <sub>S</sub>     | 1427 <sub>m</sub>    | 1427 <sub>S</sub>    |                      | 1421 <sub>S</sub>     | 1425 <sub>S</sub>    | 1419 <sub>VS</sub>    |
| $\nu_s$ (COO')                                                           |                       | 1415 <sub>m</sub>    | 1414 <sub>S</sub>    | 1414 <sub>m</sub>    | 1412 <sub>S</sub>     |                      | 1412 <sub>VS</sub>    |
| $\delta_s$ (CH <sub>3</sub> ) <sub>ester</sub>                           | 1375 <sub>m</sub>     | 1369 <sub>m</sub>    | 1377 <sub>m</sub>    | 1371 <sub>m</sub>    | 1377 <sub>S</sub>     | 1372 <sub>S</sub>    | 1377 <sub>S</sub>     |
|                                                                          |                       |                      |                      |                      | 1365 <sub>S</sub>     |                      | 1365 <sub>S</sub>     |
|                                                                          |                       |                      |                      |                      | 1296 <sub>S</sub>     |                      |                       |
|                                                                          |                       |                      |                      |                      | 1282 <sub>S</sub>     |                      |                       |
| $\nu$ (C-O-C) <sub>ester</sub>                                           |                       | 1265 <sub>m</sub>    | 1265 <sub>m</sub>    | 1261 <sub>m</sub>    | 1263 <sub>S</sub>     | 1261 <sub>m</sub>    | 1257 <sub>S</sub>     |
| $\nu$ C-O                                                                |                       | 1236 <sub>m</sub>    |                      | 1232 <sub>m</sub>    |                       | 1232 <sub>m,sh</sub> | 1240 <sub>S</sub>     |
|                                                                          |                       |                      |                      |                      | 1209 <sub>m</sub>     |                      |                       |
|                                                                          |                       |                      |                      |                      | 1176 <sub>m</sub>     |                      |                       |
| $\nu$ (C-O-C) <sub>pyranose</sub><br>+ $\nu$ (C-OH) +<br>$\nu$ (C-C)+... | 1146 <sub>S,sh</sub>  | 1138 <sub>m</sub>    | 1132 <sub>m</sub>    | 1144 <sub>m,sh</sub> | 1134 <sub>S</sub>     | 1142 <sub>S,sh</sub> | 1146 <sub>S,sh</sub>  |
|                                                                          |                       |                      |                      |                      | 1126 <sub>S</sub>     |                      |                       |
|                                                                          | 1101 <sub>VS,sh</sub> | 1099 <sub>m</sub>    | 1101 <sub>m</sub>    | 1097 <sub>S,sh</sub> | 1090 <sub>S</sub>     | 1099 <sub>S</sub>    | 1101 <sub>VS,sh</sub> |
|                                                                          | 1072 <sub>VS,sh</sub> | 1078 <sub>m</sub>    | 1068 <sub>m</sub>    | 1070 <sub>S</sub>    | 1074 <sub>S</sub>     | 1078 <sub>S</sub>    | 1066 <sub>VS</sub>    |
|                                                                          | 1046 <sub>VS</sub>    |                      |                      |                      | 1043 <sub>S</sub>     | 1039 <sub>S,sh</sub> | 1051 <sub>VS</sub>    |
|                                                                          | 1032 <sub>VS,sh</sub> | 1034 <sub>m,sh</sub> | 1032 <sub>m,sh</sub> | 1033 <sub>m,sh</sub> |                       |                      | 1031 <sub>VS</sub>    |
| $\gamma_{op}$ (O-H)                                                      |                       | 993 <sub>w,sh</sub>  | 990 <sub>m,sh</sub>  | 987 <sub>m,sh</sub>  |                       | 995 <sub>m,sh</sub>  | 993 <sub>S,sh</sub>   |
| $\rho$ (CH <sub>3</sub> ) <sub>ester</sub>                               | 920 <sub>vw</sub>     | 916 <sub>vw</sub>    | 924 <sub>vw</sub>    | 920 <sub>vw,sh</sub> | 920 <sub>vw</sub>     | 921 <sub>vw</sub>    | 916 <sub>vw</sub>     |
|                                                                          |                       |                      |                      | 910 <sub>vw</sub>    |                       |                      |                       |
|                                                                          |                       | 900 <sub>vw</sub>    |                      | 895 <sub>vw</sub>    | 895 <sub>vw</sub>     |                      | 897 <sub>vw</sub>     |
|                                                                          | 866 <sub>vw</sub>     | 864 <sub>vw</sub>    | 866 <sub>vw</sub>    | 866 <sub>vw</sub>    | 866 <sub>vw</sub>     | 868 <sub>vw</sub>    | 868 <sub>vw</sub>     |
|                                                                          | 818 <sub>w</sub>      | 818 <sub>vw</sub>    | 820 <sub>vw</sub>    | 816 <sub>w</sub>     | 820 <sub>w</sub>      | 818 <sub>vw</sub>    | 818 <sub>vw</sub>     |
|                                                                          | 777 <sub>m</sub>      | 777 <sub>w</sub>     | 777 <sub>vw</sub>    | 775 <sub>m</sub>     | 779 <sub>w</sub>      | 777 <sub>w</sub>     | 777 <sub>w</sub>      |

VS – very strong; S – strong; m- medium; w – weak; vw – vwey weak, sh – shoulder.

### Brief analysis

The 3800-2200  $\text{cm}^{-1}$  region is dominated by broad bands related to the stretching vibrations of hydroxyl and  $\text{CH}_x$  groups ( $\nu\text{O-H}$  and  $\nu\text{C-H}$ ). The  $\nu\text{O-H}$  band, with maximum at 3200-3300  $\text{cm}^{-1}$ , is associated with hydroxyl groups of the pyranose rings and adsorbed water, interacting in different intra- and intermolecular hydrogen bonds; the fraction of OH groups with weaker hydrogen-bond interactions is responsible for the high wavenumber shoulder (at  $\sim 3500 \text{ cm}^{-1}$ ). The maximum at 2930-2940  $\text{cm}^{-1}$  is assigned to  $\nu\text{CH}$  and  $\nu_{\text{as}}\text{CH}_3$  modes of the pectin backbone, and to  $\nu_{\text{as}}\text{CH}_2$  modes of galactose and arabinose rings of the “hairy” regions. The shoulder at 2860-2890  $\text{cm}^{-1}$  correlates with the  $\nu_{\text{s}}\text{CH}_3$  modes of the backbone and also with different  $\nu\text{CH}$  modes of the pyranose rings, both in HG and RG regions. Two shoulders located near 2700 and 2500  $\text{cm}^{-1}$  are frequently assigned as satellite  $\nu(\text{CO})\text{O-H}$  bands of carboxylic acid dimers. The two strong bands in the 1800-1500  $\text{cm}^{-1}$  region, with maxima at  $\sim 1730$  and  $\sim 1610 \text{ cm}^{-1}$ , are assigned to the stretching modes of carbonyl groups (mostly from esterified galacturonic acid,  $\nu(\text{C=O})\text{ester}$ ) and of carboxylate groups ( $\nu_{\text{as}}\text{COO}^-$ ), respectively. The weaker band at 1670  $\text{cm}^{-1}$  may correlate with nonesterified hydrogenated acidic carbonyl groups,  $\nu(\text{C=O})$  acid. The main  $\text{CH}_x$  and C-O-H deformation modes appear partially overlapped, in the 1500-1200  $\text{cm}^{-1}$  region. The band at 1230  $\text{cm}^{-1}$ , visible in all the spectra, and the one at 1330  $\text{cm}^{-1}$ , only detected in the orange derived samples, are assigned to in-plane deformation modes of alcohol hydroxyl groups in the pyranose rings of the pectin chain,  $\delta(\text{C-O-H})\text{pyranose}$ . The band at 1370  $\text{cm}^{-1}$  is assigned to the symmetric methyl deformation mode,  $\delta_{\text{s}}(\text{CH}_3)$ , of ester methyl groups in the galacturonic rings and of rhamnase rings of the pectin backbone. The corresponding antisymmetric mode is hardly identified as a shoulder, at  $\sim 1440 \text{ cm}^{-1}$ . The other ester-related band in this region is the C-O-C stretching mode,  $\nu(\text{C-O-C})\text{ester}$ , which appears at 1265  $\text{cm}^{-1}$ , partially overlapped with the 1230  $\text{cm}^{-1}$  band. The band at 1410  $\text{cm}^{-1}$  is assigned to the symmetric stretch of carboxylate groups,  $\nu_{\text{s}}\text{COO}^-$ , present in all the samples. The group of five intense and partially overlapped bands observed in the 1200-950  $\text{cm}^{-1}$  region is typical of pectin. These are assigned to the skeletal and C-O-C stretching modes of the pyranose ring,  $\nu(\text{C-C})\text{pyranose}$  and  $\nu(\text{C-O-C})\text{pyranose}$ , to C-O-C stretching vibrations of the glycosidic bond,  $\nu(\text{C-O-C})\text{glycoside}$ , and to a combination of the  $\nu\text{C-OH}$  and  $\nu\text{C-C}$  modes from the pyranose rings. The 950-700  $\text{cm}^{-1}$  region contains the bands related to the external deformation vibrations of methyl, methylene and methyne groups. The band at 919  $\text{cm}^{-1}$  is assigned to the rocking mode of the ester methyl group,  $\rho(\text{CH}_3)\text{ester}$ .

**Table S2.** Summary of the results obtained by deconvolution of the DRIFT spectra in the 1850 to 1500 and 1150 to 950  $\text{cm}^{-1}$  regions:  $\tilde{\nu}$  - wavenumber ( $\text{cm}^{-1}$ ); FWHM - full width at half maximum; A - integrated area.

| Orange outer skin |      |       | Orange peel   |      |       | Orange waste  |      |       | Grapefruit peel |      |       | Assignment                                                                             |
|-------------------|------|-------|---------------|------|-------|---------------|------|-------|-----------------|------|-------|----------------------------------------------------------------------------------------|
| $\tilde{\nu}$     | FWHM | A     | $\tilde{\nu}$ | FWHM | A     | $\tilde{\nu}$ | FWHM | A     | $\tilde{\nu}$   | FWHM | A     |                                                                                        |
| 1720              | 89   | 41.70 | 1731          | 73   | 41.10 | 1736          | 61   | 28.03 | 1720            | 85   | 47.29 | $\nu(\text{C}=\text{O})_{\text{ester}}$                                                |
| 1658              | 42   | 6.27  | 1666          | 66   | 24.37 | 1672          | 89   | 31.38 | 1648            | 49   | 18.83 | $\nu(\text{C}=\text{O})_{\text{acid}}$                                                 |
| 1601              | 86   | 58.67 | 1596          | 91   | 69.47 | 1599          | 86   | 54.98 | 1596            | 90   | 74.95 | $\nu_{\text{as}}\text{COO}^-$                                                          |
| 1140              | 59   | 27.88 | 1141          | 64   | 31.96 | 1153          | 39   | 16.14 | 1140            | 52   | 23.08 | $\nu(\text{C}-\text{O}-\text{C})_{\text{pyranose}}$                                    |
| 1106              | 21   | 1.91  | 1100          | 43   | 13.15 | 1116          | 60   | 35.71 | 1089            | 69   | 49.63 | $\nu(\text{C}-\text{O}-\text{C})_{\text{pyranose}}$                                    |
| 1069              | 81   | 82.86 | 1069          | 46   | 15.20 | 1063          | 71   | 51.30 | 1036            | 56   | 30.92 | $\nu(\text{C}-\text{O}-\text{C})_{\text{glycoside}}$                                   |
| 1015              | 54   | 28.34 | 1023          | 73   | 37.36 | 1014          | 51   | 23.27 | 1001            | 39   | 12.16 | $\nu(\text{C}-\text{OH})_{\text{pyranose}} + \nu(\text{C}-\text{C})_{\text{pyranose}}$ |

| Lemon outer skin |      |        | Lemon peel    |      |       | Lemon waste   |      |       | Assignment                                                                             |
|------------------|------|--------|---------------|------|-------|---------------|------|-------|----------------------------------------------------------------------------------------|
| $\tilde{\nu}$    | FWHM | A      | $\tilde{\nu}$ | FWHM | A     | $\tilde{\nu}$ | FWHM | A     |                                                                                        |
| 1738             | 56   | 22.14  | 1733          | 60   | 32.27 | 1728          | 73   | 77.38 | $\nu(\text{C}=\text{O})_{\text{ester}}$                                                |
| 1675             | 62   | 19.08  | 1683          | 79   | 26.08 | 1668          | 64   | 29.33 | $\nu(\text{C}=\text{O})_{\text{acid}}$                                                 |
| 1599             | 92   | 49.53  | 1596          | 78   | 36.18 | 1594          | 93   | 88.34 | $\nu_{\text{as}}\text{COO}^-$                                                          |
| 1148             | 32   | 5.55   | 1147          | 25   | 3.66  | 1149          | 27   | 3.64  | $\nu(\text{C}-\text{O}-\text{C})_{\text{pyranose}}$                                    |
| 1109             | 32   | 3.17   | 1096          | 80   | 62.03 | 1096          | 90   | 76.57 | $\nu(\text{C}-\text{O}-\text{C})_{\text{pyranose}}$                                    |
| 1082             | 110  | 104.10 | 1051          | 54   | 30.34 | 1050          | 52   | 26.30 | $\nu(\text{C}-\text{O}-\text{C})_{\text{glycoside}}$                                   |
| 1018             | 67   | 38.73  | 1014          | 50   | 33.68 | 1012          | 49   | 34.14 | $\nu(\text{C}-\text{OH})_{\text{pyranose}} + \nu(\text{C}-\text{C})_{\text{pyranose}}$ |

**Table S3.** Summary of the results obtained by deconvolution of the DRIFT spectra of commercial citrus pectins in the 1850 to 1500 and 1150 to 950  $\text{cm}^{-1}$  regions:  $\tilde{\nu}$  - wavenumber ( $\text{cm}^{-1}$ ); FWHM - full width at half maximum; A - integrated area.

| Citrus Pectin A |      |       | Citrus Pectin B |      |       | Citrus Pectin C <sup>a</sup> |      |      | Citrus Pectin D <sup>b</sup> |      |      | Assignment                                                               |
|-----------------|------|-------|-----------------|------|-------|------------------------------|------|------|------------------------------|------|------|--------------------------------------------------------------------------|
| $\tilde{\nu}$   | FWHM | A     | $\tilde{\nu}$   | FWHM | A     | $\tilde{\nu}$                | FWHM | A    | $\tilde{\nu}$                | FWHM | A    |                                                                          |
| 1758            | 49   | 2.55  | 1760            | 29   | 1.94  | 1756                         | 31   | 0.33 | 1764                         | 26   | 0.46 | $\nu(\text{C}=\text{O})_{\text{ester}}$                                  |
| 1722            | 47   | 2.14  | 1735            | 57   | 10.84 | 1731                         | 48   | 0.79 | 1734                         | 83   | 5.78 | $\nu(\text{C}=\text{O})_{\text{ester}}$                                  |
| 1670            | 55   | 1.60  | 1671            | 77   | 4.32  | 1680                         | 43   | 0.15 | 1666                         | 42   | 0.69 | $\nu(\text{C}=\text{O})_{\text{acid}}$                                   |
| -               | -    | -     | 1628            | 90   | 6.69  | 1627                         | 84   | 1.24 | 1631                         | 50   | 1.76 | $\delta\text{H-O-H} (\text{H}_2\text{O})$                                |
| 1600            | 43   | 0.60  | 1598            | 49   | 3.64  | 1595                         | 55   | 0.40 | 1594                         | 41   | 0.34 | $\nu_{\text{as}}\text{COO}^-$                                            |
|                 |      |       |                 |      |       |                              |      |      |                              |      |      |                                                                          |
| 1149            | 18   | 5.94  | 1149            | 47   | 6.43  | 1146                         | 45   | 0.77 | 1152                         | 52   | 2.90 | $\nu(\text{C-O-C})_{\text{pyranose}}$                                    |
| 1110            | 26   | 10.02 | 1100            | 46   | 8.62  | 1103                         | 38   | 0.80 | 1106                         | 48   | 1.80 | $\nu(\text{C-O-C})_{\text{pyranose}}$                                    |
| 1052            | 17   | 6.03  | 1051            | 23   | 1.82  | 1049                         | 19   | 0.09 | 1052                         | 93   | 6.46 | $\nu(\text{C-O-C})_{\text{glycoside}}$                                   |
| 1025            | 21   | 11.15 | 1022            | 50   | 10.05 | 1021                         | 54   | 1.37 | 1009                         | 42   | 1.25 | $\nu(\text{C-OH})_{\text{pyranose}} + \nu(\text{C-C})_{\text{pyranose}}$ |

<sup>a</sup> esterified potassium salt

<sup>b</sup> esterified

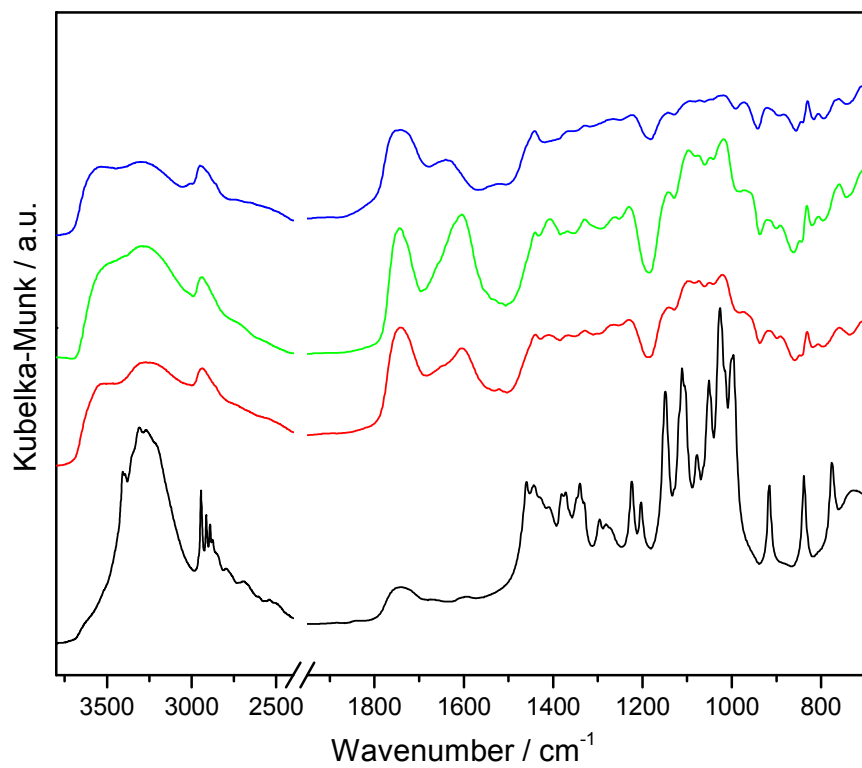

**Figure S1.** DRIFT spectra of commercial pectins: black – citrus pectin A; red – citrus pectin B; green – citrus pectin C; blue – citrus pectin D.
